# Supplementary material for: Pentacycloundecanylidene and pentacycloundecanone – hyperconjugatively stabilized carbene and ketone
Source: Royal Society of Chemistry journal article supplement (doi:10.1039/d4cp01248h), 2024-01-01
Supplement: d4cp01248h2.pdf [file d4cp01248h2.pdf]

**Supporting Information of Pentacycloundecanylidene and  
Pentacycloundecanone – Hyperconjugatively Stabilized Carbene and  
Ketone**

Jishnu Sai Gopinath and Pattiyil Parameswaran\*

---

\* Department of Chemistry, National Institute of Technology Calicut, Kozhikode, Kerala, India  
– 673601, Email: [param@nitc.ac.in](mailto:param@nitc.ac.in)

## Table of Contents

|                                                                                            |   |
|--------------------------------------------------------------------------------------------|---|
| EDA data table for the protonated and hydride adducts                                      | 3 |
| Geometry of the transition state ( <b>U<sub>TS</sub></b> ) between <b>U1</b> and <b>U2</b> | 4 |
| Deformation density plots corresponding to $\sigma$ bonding interactions in <b>U1</b>      | 4 |
| Deformation density plots corresponding to $\sigma$ bonding interactions in <b>U2</b>      | 4 |
| Deformation density plots corresponding to $\sigma$ bonding interactions in <b>U3</b>      | 5 |
| Deformation density plots corresponding to $\sigma$ bonding interactions in <b>U-CO</b>    | 5 |
| Energy profile diagram and potential energy surface for the interconversion                | 6 |
| Cartesian coordinates of the all geometries used in the study                              | 7 |

**Table S1:** EDA-NOCV results of **U1-H<sup>+</sup>**, **U2-H<sup>+</sup>**, **U1-H<sup>-</sup>**, **U2-H<sup>-</sup>** and **U-CO-H<sup>-</sup>** at the BP86/TZ2P level of theory. Energies are in kcal/mol.

|                           | <b>U1-H<sup>+</sup></b> | <b>U2-H<sup>+</sup></b> | <b>U1-H<sup>-</sup></b> | <b>U2-H<sup>-</sup></b> | <b>U-CO-H<sup>-</sup></b> |
|---------------------------|-------------------------|-------------------------|-------------------------|-------------------------|---------------------------|
| $\Delta E_{\text{int}}$   | -363.5                  | -353.5                  | -200.0                  | -199.2                  | -172.7                    |
| $\Delta E_{\text{pauli}}$ | 533.3                   | 589.8                   | 677.5                   | 695.7                   | 535.5                     |
| $\Delta E_{\text{ele}}$   | -272.7                  | -259.1                  | -395.3                  | -404.4                  | -334.2                    |
| $\Delta E_{\text{orb}}$   | -624.1                  | -684.2                  | -482.2                  | -490.5                  | -374.0                    |
| $\Delta E_{\sigma 1}$     | -315.7                  | -375.5                  | -271.7                  | -276.2                  | -174.4                    |
| $\Delta E_{\sigma 2}$     | -177.9                  | -169.6                  | -157.7                  | -158.7                  | -158.7                    |
| $\Delta E_{\text{h1}}$    | -85.0                   | -84.0                   | --                      | --                      | --                        |
| $\Delta E_{\text{h2}}$    | --                      | --                      | -29.1                   | -32.0                   | --                        |
| $\Delta E_{\text{rest}}$  | -45.5                   | -55.1                   | -55.1                   | -23.6                   | -40.2                     |
| $\Delta E_{\text{prep}}$  | 70.3                    | 62.5                    | 41.7                    | 40.7                    | 49.3                      |
| <b>-De</b>                | -293.2                  | -291.0                  | -158.3                  | -158.5                  | -123.4                    |

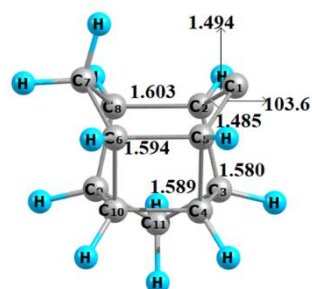

$$U_{TS}$$

$$\theta_b = 7.5^\circ$$

$$(1.3)$$

**Figure S1:** Equilibrium geometry of transition state ( $U_{TS}$ ) between the singlet isomers **U1** and **U2** at the BP86/def2-TZVPP level of theory.  $\theta_b$  is the bending angle in degrees. The energy barrier based on **U1** in kcal/mol is given in parentheses.

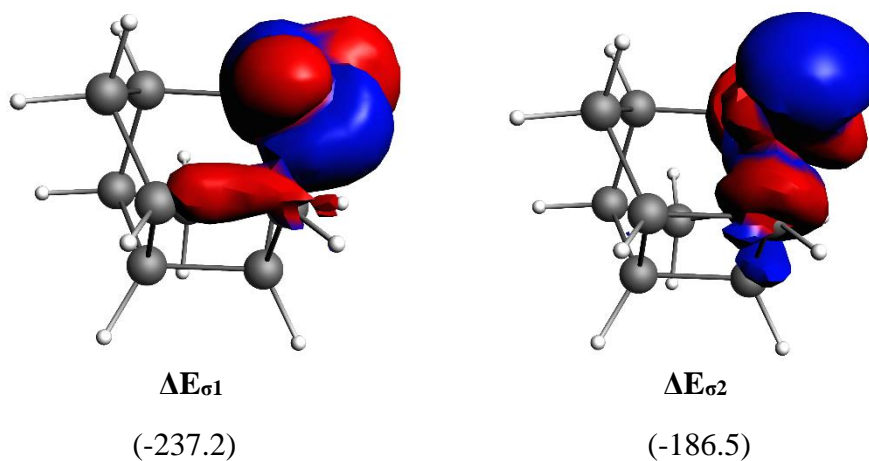

**Figure S2:** Deformation density plots corresponding to the  $\sigma$ -bonding interactions present in **U1**. Isosurface value is 0.003. The charge flow is from red to blue. Corresponding energies in kcal/mol are given in parentheses.

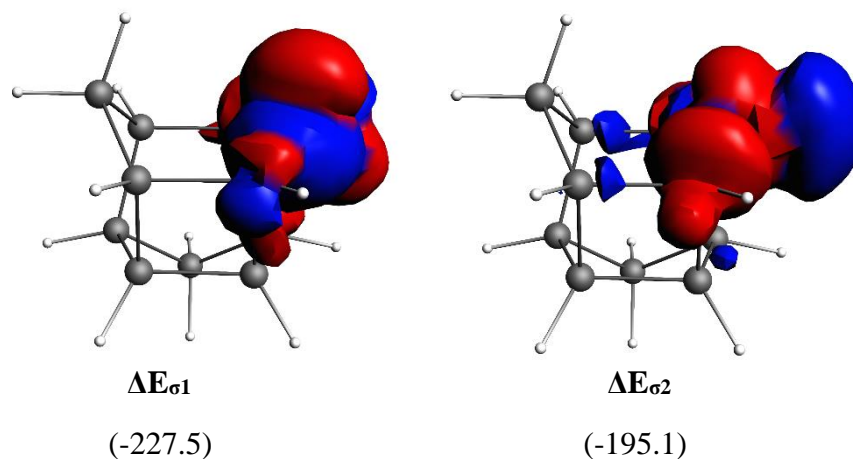

**Figure S3:** Deformation density plots corresponding to the  $\sigma$ -bonding interactions present in **U2**. Isosurface value is 0.003. The charge flow is from red to blue. Corresponding energies in kcal/mol are given in parentheses.

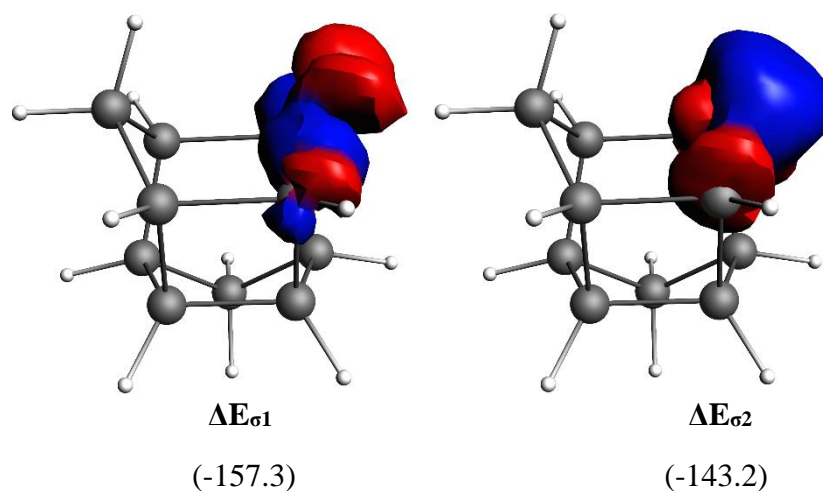

**Figure S4:** Deformation density plots corresponding to the  $\sigma$ -bonding interactions present in **U3**. Isosurface value is 0.003. The charge flow is from red to blue. Corresponding energies in kcal/mol are given in parentheses.

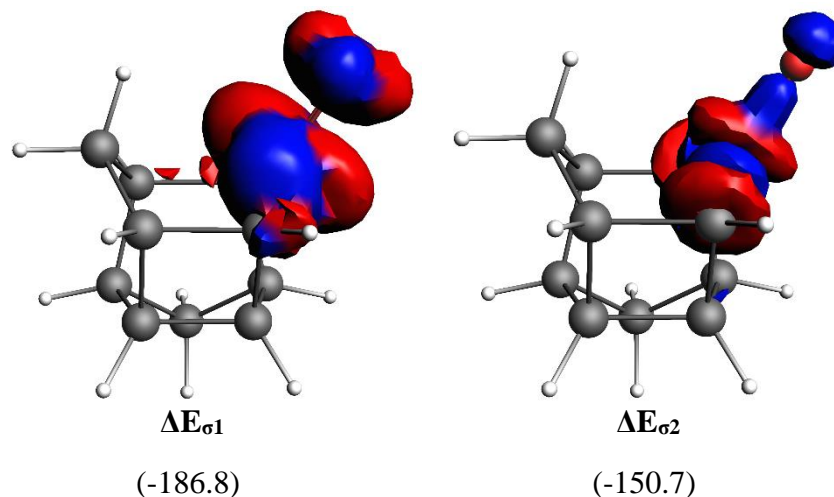

**Figure S5:** Deformation density plots corresponding to the  $\sigma$ -bonding interactions present in **U-CO**. Isosurface value is 0.003. The charge flow is from red to blue. Corresponding energies in kcal/mol are given in parentheses.

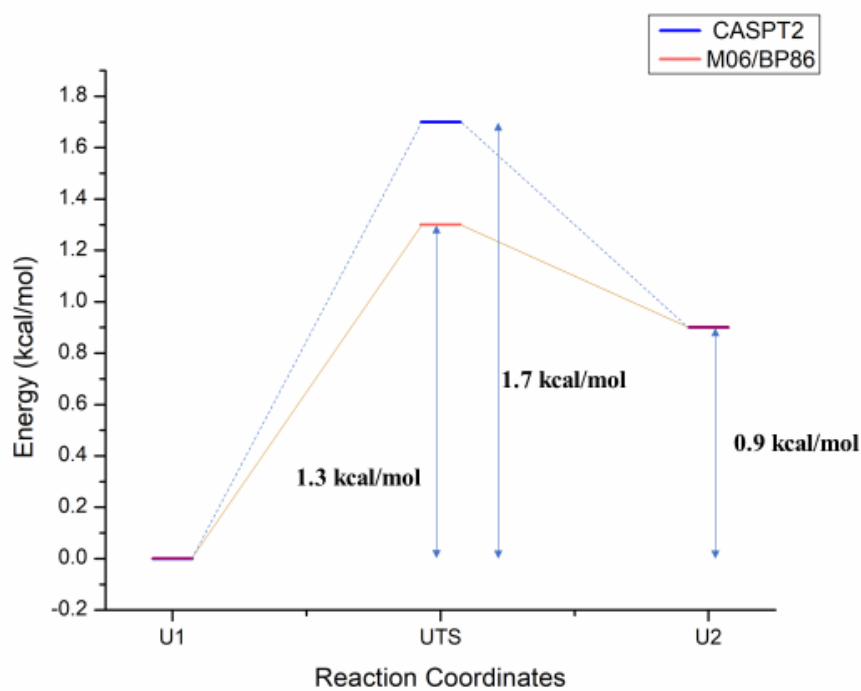

**Figure S6:** The energy profile diagram of the interconversion between U1 and U2 at M06/def2-TZVPP//BP86/def2-TZVPP level and CASPT2/cc-pVTZ level of theory.

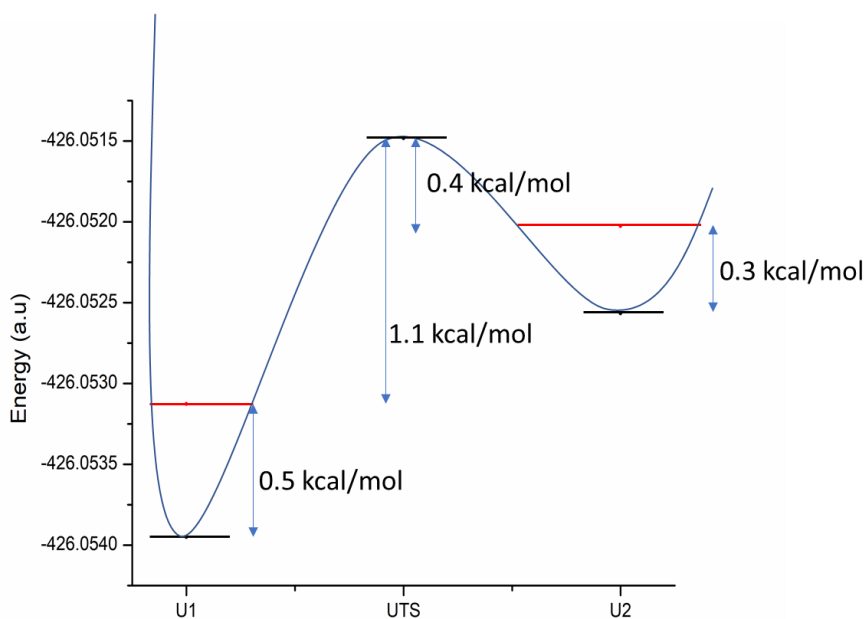

**Figure S7:** The schematic representation of the potential energy curve for the interconversion of U1 and U2 at M06/def2-TZVPP//BP86/def2-TZVPP level. The red line indicates the energy level of the first vibrational state ( $v = 0$ ).

**Table S2:** Cartesian coordinates of optimized geometries at BP86/def2-TZVPP level of theory,  $E_{M06}^{el}$  (the electronic energy obtained at M06/def2-TZVPP level of theory),  $ZPE_{BP86}$  ( the zero point energy obtained from the geometry optimized at BP86/def2-TZVPP level of theory) and  $E_{total}$  ( the sum of  $ZPE_{BP86}$  and  $E_{M06}^{el}$ ) of B<sub>2</sub>-L and B<sub>2</sub><sup>2+</sup>-L. Tin parenthesis indicates triplet geometry, rest are singlet geometries. Energies are in a.u.

**U1**

**$E_{M06}^{el} = -426.0539273$**

**$ZPE_{BP86} = 0.193064$**

**$E_{total} = -425.8608633$**

|          |                        |                        |                        |
|----------|------------------------|------------------------|------------------------|
| <b>C</b> | <b>0.002792000000</b>  | <b>0.242371000000</b>  | <b>-1.384597000000</b> |
| <b>C</b> | <b>0.831925000000</b>  | <b>1.174582000000</b>  | <b>-0.445197000000</b> |
| <b>C</b> | <b>1.290953000000</b>  | <b>-0.901786000000</b> | <b>0.336537000000</b>  |
| <b>C</b> | <b>0.334638000000</b>  | <b>-1.188119000000</b> | <b>-0.848954000000</b> |
| <b>H</b> | <b>0.110228000000</b>  | <b>0.436120000000</b>  | <b>-2.458494000000</b> |
| <b>H</b> | <b>0.663260000000</b>  | <b>-1.948413000000</b> | <b>-1.567823000000</b> |
| <b>C</b> | <b>2.074626000000</b>  | <b>0.342111000000</b>  | <b>-0.104645000000</b> |
| <b>H</b> | <b>2.680217000000</b>  | <b>0.786903000000</b>  | <b>0.699573000000</b>  |
| <b>H</b> | <b>2.727552000000</b>  | <b>0.159743000000</b>  | <b>-0.972106000000</b> |
| <b>C</b> | <b>-0.051310000000</b> | <b>1.142835000000</b>  | <b>0.831992000000</b>  |
| <b>H</b> | <b>0.212356000000</b>  | <b>1.888071000000</b>  | <b>1.592479000000</b>  |
| <b>C</b> | <b>0.257647000000</b>  | <b>-0.361783000000</b> | <b>1.391620000000</b>  |
| <b>H</b> | <b>0.633699000000</b>  | <b>-0.303888000000</b> | <b>2.421563000000</b>  |
| <b>H</b> | <b>1.008410000000</b>  | <b>2.190782000000</b>  | <b>-0.823808000000</b> |
| <b>H</b> | <b>1.879444000000</b>  | <b>-1.762080000000</b> | <b>0.681703000000</b>  |
| <b>C</b> | <b>-1.048796000000</b> | <b>-1.056267000000</b> | <b>1.231556000000</b>  |
| <b>C</b> | <b>-1.445633000000</b> | <b>0.172668000000</b>  | <b>-0.794172000000</b> |
| <b>C</b> | <b>-1.479696000000</b> | <b>1.265494000000</b>  | <b>0.277217000000</b>  |
| <b>C</b> | <b>-1.094925000000</b> | <b>-1.317357000000</b> | <b>-0.211944000000</b> |
| <b>H</b> | <b>-1.788224000000</b> | <b>-2.088381000000</b> | <b>-0.567702000000</b> |
| <b>H</b> | <b>-2.274577000000</b> | <b>1.155036000000</b>  | <b>1.023705000000</b>  |
| <b>H</b> | <b>-1.593274000000</b> | <b>2.246222000000</b>  | <b>-0.216733000000</b> |
| <b>H</b> | <b>-2.292423000000</b> | <b>0.151401000000</b>  | <b>-1.488843000000</b> |

U2

$$E_{M06}^{el} = -426.0525657$$

$$ZPE_{BP86} = 0.193236$$

$$E_{total} = -425.8593297$$

|   |                 |                 |                 |
|---|-----------------|-----------------|-----------------|
| C | 0.150036000000  | -0.347785000000 | -1.347757000000 |
| C | -0.748644000000 | -1.240638000000 | -0.448607000000 |
| C | -1.324077000000 | 0.867429000000  | 0.205265000000  |
| C | -0.236725000000 | 1.114052000000  | -0.912829000000 |
| H | 0.117097000000  | -0.564287000000 | -2.422253000000 |
| H | -0.481263000000 | 1.864172000000  | -1.671047000000 |
| C | -2.025654000000 | -0.418371000000 | -0.265890000000 |
| H | -2.709977000000 | -0.829814000000 | 0.490030000000  |
| H | -2.586550000000 | -0.257239000000 | -1.201242000000 |
| C | -0.003364000000 | -1.102733000000 | 0.913844000000  |
| H | -0.327164000000 | -1.833009000000 | 1.668438000000  |
| C | -0.370364000000 | 0.370896000000  | 1.364286000000  |
| H | -0.839407000000 | 0.426461000000  | 2.353649000000  |
| H | -0.865799000000 | -2.271246000000 | -0.810127000000 |
| H | -1.956692000000 | 1.722791000000  | 0.453792000000  |
| C | 0.547926000000  | 1.507163000000  | 1.054198000000  |
| C | 1.545148000000  | -0.240164000000 | -0.651666000000 |
| C | 1.483797000000  | -1.201431000000 | 0.539310000000  |
| C | 1.221950000000  | 1.224922000000  | -0.211253000000 |
| H | 1.878419000000  | 2.013532000000  | -0.596414000000 |
| H | 2.159840000000  | -0.909786000000 | 1.358352000000  |
| H | 1.739942000000  | -2.228485000000 | 0.234290000000  |
| H | 2.431377000000  | -0.333137000000 | -1.290878000000 |

U3

$$E_{M06}^{el} = -426.0454726$$



**ZPE<sub>BP86</sub> = 0.19356**

**E<sub>total</sub> = -425.8519126**

|          |                        |                        |                        |
|----------|------------------------|------------------------|------------------------|
| <b>C</b> | <b>0.052516000000</b>  | <b>-0.314119000000</b> | <b>-1.376539000000</b> |
| <b>C</b> | <b>-0.832154000000</b> | <b>-1.187625000000</b> | <b>-0.436724000000</b> |
| <b>C</b> | <b>-1.276236000000</b> | <b>0.924512000000</b>  | <b>0.264977000000</b>  |
| <b>C</b> | <b>-0.256244000000</b> | <b>1.143836000000</b>  | <b>-0.896123000000</b> |
| <b>H</b> | <b>-0.038148000000</b> | <b>-0.530637000000</b> | <b>-2.447942000000</b> |
| <b>H</b> | <b>-0.539386000000</b> | <b>1.898501000000</b>  | <b>-1.639574000000</b> |
| <b>C</b> | <b>-2.069153000000</b> | <b>-0.311456000000</b> | <b>-0.181537000000</b> |
| <b>H</b> | <b>-2.729753000000</b> | <b>-0.709348000000</b> | <b>0.603795000000</b>  |
| <b>H</b> | <b>-2.669126000000</b> | <b>-0.135631000000</b> | <b>-1.087850000000</b> |
| <b>C</b> | <b>-0.011120000000</b> | <b>-1.114560000000</b> | <b>0.883173000000</b>  |
| <b>H</b> | <b>-0.309991000000</b> | <b>-1.857951000000</b> | <b>1.634683000000</b>  |
| <b>C</b> | <b>-0.317192000000</b> | <b>0.385898000000</b>  | <b>1.396107000000</b>  |
| <b>H</b> | <b>-0.753643000000</b> | <b>0.396461000000</b>  | <b>2.402334000000</b>  |
| <b>H</b> | <b>-1.019856000000</b> | <b>-2.209839000000</b> | <b>-0.792580000000</b> |
| <b>H</b> | <b>-1.845336000000</b> | <b>1.814105000000</b>  | <b>0.560378000000</b>  |
| <b>C</b> | <b>0.884771000000</b>  | <b>1.223756000000</b>  | <b>1.183670000000</b>  |
| <b>C</b> | <b>1.486139000000</b>  | <b>-0.256277000000</b> | <b>-0.750392000000</b> |
| <b>C</b> | <b>1.450105000000</b>  | <b>-1.243626000000</b> | <b>0.420064000000</b>  |
| <b>C</b> | <b>1.196233000000</b>  | <b>1.240604000000</b>  | <b>-0.250400000000</b> |
| <b>H</b> | <b>1.882854000000</b>  | <b>2.005993000000</b>  | <b>-0.629495000000</b> |
| <b>H</b> | <b>2.175855000000</b>  | <b>-0.991947000000</b> | <b>1.208643000000</b>  |
| <b>H</b> | <b>1.655482000000</b>  | <b>-2.270207000000</b> | <b>0.075767000000</b>  |
| <b>H</b> | <b>2.345053000000</b>  | <b>-0.355158000000</b> | <b>-1.425825000000</b> |

**U-CO**

**E<sup>el</sup><sub>M06</sub> = -501.4079901**

**ZPE<sub>BP86</sub> = 0.200079**

**E<sub>total</sub> = -501.2079111**

|   |                 |                 |                 |
|---|-----------------|-----------------|-----------------|
| C | -1.103935000000 | 0.854708000000  | 0.890797000000  |
| C | -1.686381000000 | 0.377047000000  | -0.469418000000 |
| C | -0.594229000000 | -1.463490000000 | 0.280512000000  |
| C | -0.347530000000 | -0.413062000000 | 1.415418000000  |
| H | -1.813329000000 | 1.353359000000  | 1.561673000000  |
| H | -0.558105000000 | -0.769048000000 | 2.430409000000  |
| C | -1.999965000000 | -1.107244000000 | -0.228155000000 |
| H | -2.282284000000 | -1.647995000000 | -1.143841000000 |
| H | -2.781645000000 | -1.268429000000 | 0.530435000000  |
| C | -0.397665000000 | 0.368558000000  | -1.347105000000 |
| H | -0.595534000000 | 0.298849000000  | -2.424656000000 |
| C | 0.362543000000  | -0.935950000000 | -0.828121000000 |
| H | 0.595346000000  | -1.645132000000 | -1.630063000000 |
| H | -2.498376000000 | 0.994625000000  | -0.875604000000 |
| H | -0.417259000000 | -2.506551000000 | 0.572085000000  |
| C | 1.594707000000  | -0.505322000000 | -0.040325000000 |
| C | 0.270630000000  | 1.552187000000  | 0.596621000000  |
| C | 0.342465000000  | 1.653231000000  | -0.931182000000 |
| C | 1.033149000000  | 0.270044000000  | 1.139995000000  |
| H | 1.742962000000  | 0.426570000000  | 1.958158000000  |
| H | 1.371843000000  | 1.713838000000  | -1.316494000000 |
| H | -0.203645000000 | 2.540501000000  | -1.288663000000 |
| H | 0.500842000000  | 2.476265000000  | 1.139770000000  |
| O | 2.762055000000  | -0.733887000000 | -0.298430000000 |

**U1-H<sup>+</sup>**

**E<sup>el</sup><sub>M06</sub> = -426.4853801**

**ZPE<sub>BP86</sub> = 0.206102**

**E<sub>total</sub> = -426.2792781**

|   |                 |                |                |
|---|-----------------|----------------|----------------|
| C | -0.081965000000 | 0.107529000000 | 1.369620000000 |
|---|-----------------|----------------|----------------|

|   |                 |                 |                 |
|---|-----------------|-----------------|-----------------|
| C | -0.979842000000 | 1.078020000000  | 0.521275000000  |
| C | -1.193697000000 | -0.924182000000 | -0.515644000000 |
| C | -0.343019000000 | -1.299327000000 | 0.732914000000  |
| H | -0.177824000000 | 0.169272000000  | 2.459708000000  |
| H | -0.750950000000 | -2.077803000000 | 1.383548000000  |
| C | -2.113192000000 | 0.183139000000  | 0.004344000000  |
| H | -2.708818000000 | 0.667404000000  | -0.781256000000 |
| H | -2.795271000000 | -0.164294000000 | 0.792369000000  |
| C | -0.057080000000 | 1.292343000000  | -0.708631000000 |
| H | -0.384813000000 | 2.081202000000  | -1.393959000000 |
| C | -0.108743000000 | -0.176711000000 | -1.377938000000 |
| H | -0.296842000000 | -0.124654000000 | -2.456097000000 |
| H | -1.276577000000 | 2.005186000000  | 1.025211000000  |
| H | -1.662158000000 | -1.780969000000 | -1.014599000000 |
| C | 1.170520000000  | -0.867521000000 | -1.025088000000 |
| C | 1.363418000000  | 0.312090000000  | 0.850251000000  |
| C | 1.332064000000  | 1.483851000000  | -0.094261000000 |
| C | 1.069851000000  | -1.508402000000 | 0.195498000000  |
| H | 1.838123000000  | -2.144447000000 | 0.636220000000  |
| H | 2.177758000000  | 1.573278000000  | -0.786138000000 |
| H | 1.342939000000  | 2.383827000000  | 0.551056000000  |
| H | 2.246098000000  | 0.119087000000  | 1.465844000000  |
| H | 2.098435000000  | -0.792061000000 | -1.595945000000 |

U2-H<sup>+</sup>

$E_{M06}^{el} = -426.4852523$

ZPE<sub>BP86</sub> = 0.206985

$E_{total} = -426.2782673$

|   |                 |                 |                 |
|---|-----------------|-----------------|-----------------|
| C | 0.150226000000  | -0.322639000000 | -1.296964000000 |
| C | -0.790921000000 | -1.220523000000 | -0.446603000000 |

|   |                 |                 |                 |
|---|-----------------|-----------------|-----------------|
| C | -1.426375000000 | 0.861825000000  | 0.205872000000  |
| C | -0.278600000000 | 1.133638000000  | -0.841244000000 |
| H | 0.110788000000  | -0.448287000000 | -2.383961000000 |
| H | -0.335761000000 | 1.960847000000  | -1.551790000000 |
| C | -2.083268000000 | -0.412227000000 | -0.323550000000 |
| H | -2.786784000000 | -0.833556000000 | 0.407680000000  |
| H | -2.612085000000 | -0.261880000000 | -1.275552000000 |
| C | -0.084455000000 | -1.078829000000 | 0.932892000000  |
| H | -0.471130000000 | -1.757560000000 | 1.702150000000  |
| C | -0.410563000000 | 0.417682000000  | 1.310415000000  |
| H | -0.697411000000 | 0.583226000000  | 2.352358000000  |
| H | -0.876014000000 | -2.248245000000 | -0.817183000000 |
| H | -2.041401000000 | 1.735236000000  | 0.439308000000  |
| C | 0.598565000000  | 1.413826000000  | 0.763525000000  |
| C | 1.570043000000  | -0.391534000000 | -0.636846000000 |
| C | 1.398814000000  | -1.293601000000 | 0.601538000000  |
| C | 1.521988000000  | 1.054940000000  | -0.218477000000 |
| H | 2.119060000000  | 1.831291000000  | -0.704100000000 |
| H | 2.086094000000  | -1.020048000000 | 1.415827000000  |
| H | 1.586960000000  | -2.344220000000 | 0.342903000000  |
| H | 2.406253000000  | -0.633030000000 | -1.297782000000 |
| H | 0.518719000000  | 2.460887000000  | 1.066787000000  |

U1-H

$E_{M06}^{el} = -426.7207567$

$ZPE_{BP86} = 0.200746$

$E_{total} = -426.5200107$

|   |                 |                 |                 |
|---|-----------------|-----------------|-----------------|
| C | -0.172068000000 | 0.725982000000  | 1.250128000000  |
| C | -1.046552000000 | 1.160268000000  | 0.033950000000  |
| C | -1.136814000000 | -1.102085000000 | -0.039664000000 |

|   |                 |                 |                 |
|---|-----------------|-----------------|-----------------|
| C | -0.243581000000 | -0.841560000000 | 1.194217000000  |
| H | -0.410837000000 | 1.232875000000  | 2.198879000000  |
| H | -0.519046000000 | -1.388203000000 | 2.111682000000  |
| C | -2.132076000000 | 0.069465000000  | -0.044747000000 |
| H | -2.730096000000 | 0.123435000000  | -0.973188000000 |
| H | -2.825064000000 | 0.093690000000  | 0.815376000000  |
| C | -0.074388000000 | 0.834901000000  | -1.137795000000 |
| H | -0.382407000000 | 1.292702000000  | -2.093407000000 |
| C | -0.089169000000 | -0.773379000000 | -1.202599000000 |
| H | -0.461039000000 | -1.113397000000 | -2.185600000000 |
| H | -1.401193000000 | 2.203791000000  | 0.063929000000  |
| H | -1.555578000000 | -2.116372000000 | -0.115929000000 |
| C | 1.257873000000  | -1.346005000000 | -0.793093000000 |
| C | 1.313490000000  | 0.697794000000  | 0.760656000000  |
| C | 1.295955000000  | 1.322131000000  | -0.637696000000 |
| C | 1.274838000000  | -0.898730000000 | 0.646241000000  |
| H | 1.997849000000  | -1.410718000000 | 1.303206000000  |
| H | 2.105655000000  | 0.901443000000  | -1.256381000000 |
| H | 1.352944000000  | 2.427028000000  | -0.607056000000 |
| H | 2.072866000000  | 1.111649000000  | 1.444952000000  |
| H | 1.270887000000  | -2.450615000000 | -0.884048000000 |

U2-H

$E_{M06}^{el} = -426.7215657$

$ZPE_{BP86} = 0.200674$

$E_{total} = -426.5208917$

|   |                 |                 |                 |
|---|-----------------|-----------------|-----------------|
| C | -0.166321000000 | -0.725926000000 | -1.249501000000 |
| C | -1.039341000000 | -1.173830000000 | -0.040087000000 |
| C | -1.143350000000 | 1.095639000000  | 0.064017000000  |
| C | -0.239664000000 | 0.845069000000  | -1.176037000000 |

|   |                 |                 |                 |
|---|-----------------|-----------------|-----------------|
| H | -0.412720000000 | -1.217262000000 | -2.204482000000 |
| H | -0.523875000000 | 1.392108000000  | -2.088916000000 |
| C | -2.127207000000 | -0.089606000000 | 0.048614000000  |
| H | -2.735409000000 | -0.156649000000 | 0.968142000000  |
| H | -2.808125000000 | -0.092485000000 | -0.821804000000 |
| C | -0.072464000000 | -0.846411000000 | 1.134868000000  |
| H | -0.376436000000 | -1.307423000000 | 2.091957000000  |
| C | -0.110979000000 | 0.792182000000  | 1.199283000000  |
| H | -0.470457000000 | 1.100917000000  | 2.198118000000  |
| H | -1.390672000000 | -2.219067000000 | -0.090516000000 |
| H | -1.577974000000 | 2.100748000000  | 0.135542000000  |
| C | 1.134330000000  | 1.506997000000  | 0.712634000000  |
| C | 1.316969000000  | -0.707223000000 | -0.772306000000 |
| C | 1.310964000000  | -1.297518000000 | 0.638925000000  |
| C | 1.249798000000  | 0.929128000000  | -0.667648000000 |
| H | 1.976338000000  | 1.406048000000  | -1.350246000000 |
| H | 2.115195000000  | -0.848283000000 | 1.253696000000  |
| H | 1.422999000000  | -2.397974000000 | 0.651838000000  |
| H | 2.074696000000  | -1.127733000000 | -1.456694000000 |
| H | 2.030023000000  | 1.396049000000  | 1.356792000000  |

U-CO-H

$E_{M06}^{el} = -502.0006927$

$ZPE_{BP86} = 0.206749$

$E_{total} = -501.7939437$

|   |                 |                 |                 |
|---|-----------------|-----------------|-----------------|
| C | -1.048208000000 | 0.931828000000  | 0.895085000000  |
| C | -1.587034000000 | 0.655272000000  | -0.537523000000 |
| C | -0.888576000000 | -1.392041000000 | 0.140398000000  |
| C | -0.564996000000 | -0.482175000000 | 1.376033000000  |
| H | -1.723430000000 | 1.503631000000  | 1.549695000000  |

|   |                 |                 |                 |
|---|-----------------|-----------------|-----------------|
| H | -0.949639000000 | -0.856886000000 | 2.337987000000  |
| C | -2.172316000000 | -0.762845000000 | -0.431187000000 |
| H | -2.465120000000 | -1.187510000000 | -1.406504000000 |
| H | -3.038568000000 | -0.823098000000 | 0.254588000000  |
| C | -0.243443000000 | 0.466018000000  | -1.312162000000 |
| H | -0.369423000000 | 0.514339000000  | -2.405569000000 |
| C | 0.237494000000  | -0.963094000000 | -0.832646000000 |
| H | 0.385838000000  | -1.652624000000 | -1.677828000000 |
| H | -2.246582000000 | 1.438488000000  | -0.945518000000 |
| H | -0.924499000000 | -2.469421000000 | 0.355511000000  |
| C | 1.548541000000  | -0.886709000000 | 0.078604000000  |
| C | 0.447449000000  | 1.393512000000  | 0.752529000000  |
| C | 0.669442000000  | 1.577700000000  | -0.756510000000 |
| C | 0.920499000000  | -0.020690000000 | 1.245222000000  |
| H | 1.546055000000  | -0.022260000000 | 2.149534000000  |
| H | 1.721562000000  | 1.405483000000  | -1.028471000000 |
| H | 0.317065000000  | 2.572445000000  | -1.091356000000 |
| H | 0.762950000000  | 2.249056000000  | 1.369250000000  |
| H | 1.583650000000  | -1.942805000000 | 0.540854000000  |
| O | 2.685879000000  | -0.478686000000 | -0.463654000000 |

U<sub>TS</sub>

$E_{M06}^{el} = -426.0514582$

$ZPE_{BP86} = 0.192688$

$E_{total} = -425.8587702$

|   |                 |                 |                 |
|---|-----------------|-----------------|-----------------|
| C | -0.046103000000 | 0.439105000000  | -1.351787000000 |
| C | 0.842468000000  | 1.220617000000  | -0.340560000000 |
| C | 1.257762000000  | -0.950511000000 | 0.186192000000  |
| C | 0.240948000000  | -1.054946000000 | -0.993443000000 |
| H | 0.045014000000  | 0.749022000000  | -2.399230000000 |

|   |                 |                 |                 |
|---|-----------------|-----------------|-----------------|
| H | 0.501628000000  | -1.752471000000 | -1.797348000000 |
| C | 2.064879000000  | 0.316121000000  | -0.139498000000 |
| H | 2.717194000000  | 0.644141000000  | 0.682726000000  |
| H | 2.678754000000  | 0.192916000000  | -1.046155000000 |
| C | 0.011823000000  | 1.042094000000  | 0.961145000000  |
| H | 0.325045000000  | 1.694511000000  | 1.786528000000  |
| C | 0.285376000000  | -0.490556000000 | 1.342958000000  |
| H | 0.732018000000  | -0.580174000000 | 2.341508000000  |
| H | 1.037837000000  | 2.267089000000  | -0.610251000000 |
| H | 1.826735000000  | -1.862809000000 | 0.397593000000  |
| C | -0.854749000000 | -1.423870000000 | 1.098124000000  |
| C | -1.474518000000 | 0.326687000000  | -0.718970000000 |
| C | -1.440192000000 | 1.241583000000  | 0.505864000000  |
| C | -1.195297000000 | -1.193089000000 | -0.328679000000 |
| H | -1.894397000000 | -1.912915000000 | -0.770304000000 |
| H | -2.188035000000 | 0.986070000000  | 1.270115000000  |
| H | -1.600040000000 | 2.289225000000  | 0.202344000000  |
| H | -2.336135000000 | 0.445991000000  | -1.385601000000 |
